# Supplementary material for: Snf7 spirals sense and alter membrane curvature
Source: PubMed Central journal article supplement (PMC9023468; doi:10.1038/s41467-022-29850-z), 2022-04-21
Supplement: 41467_2022_29850_MOESM1_ESM.pdf [file 41467_2022_29850_MOESM1_ESM.pdf]

## **Snf7 spirals sense and alter membrane curvature**

Nebojsa Jukic<sup>1,#</sup>, Alma P. Perrino<sup>2,#</sup>, Frédéric Humbert<sup>3</sup>, Aurélien Roux<sup>3,4</sup>  
and Simon Scheuring<sup>2,5,6\*</sup>

<sup>1</sup>Physiology, Biophysics and Systems Biology Graduate Program, Weill Cornell Medicine, New York City, NY 10065, USA

<sup>2</sup>Department of Anesthesiology, Weill Cornell Medicine, New York City, NY 10065, USA

<sup>3</sup>Department of Biochemistry, University of Geneva, CH-1211 Geneva, Switzerland

<sup>4</sup>Swiss National Centre for Competence in Research Programme Chemical Biology, CH-1211 Geneva, Switzerland

<sup>5</sup>Department of Physiology and Biophysics, Weill Cornell Medicine, New York City, NY 10065, USA

<sup>6</sup>Kavli Institute at Cornell for Nanoscale Science, Cornell University, Ithaca, New York 14853, USA

# These authors contributed equally

\* Correspondence to: sis2019@med.cornell.edu

### **Supplementary Information**

## Supplementary Figure 1)

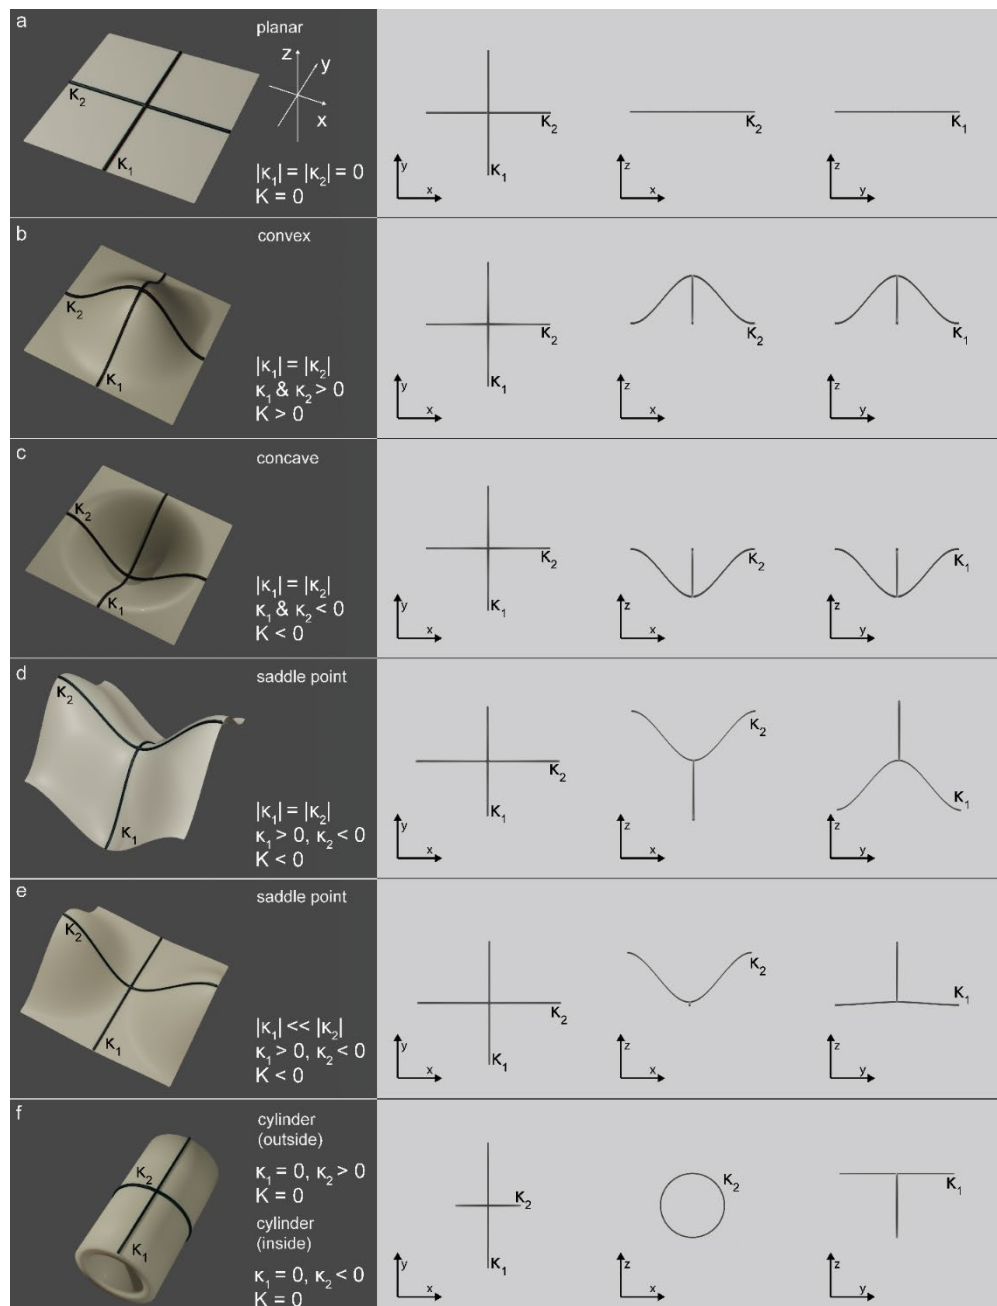

**Supplementary Figure 1: The different geometries of curved membranes used for observations of ESCRT assemblies on lipid bilayers.** (a) Planar supported lipid bilayers are often used in fluorescence microscopy and former HS-AFM studies of ESCRT proteins, but do not reflect the complexity of *in vivo* membrane geometry. The principal curvatures of the membrane ( $κ_1$  and  $κ_2$ ) are 0 and so is the Gaussian curvature ( $K = κ_1 \times κ_2$ ). (b) Representation of a convex supported lipid bilayer, with both principal curvatures being greater than zero, resulting in a positive Gaussian curvature. (c) Representation of a concave supported lipid bilayer, with both principal curvatures being less than zero, resulting in positive Gaussian curvature. (d) A representation of a saddle point on the lipid bilayer, with principal curvatures of equal magnitudes but opposite signs, resulting in negative Gaussian curvature. (e) A representation of a saddle point on the lipid bilayer, with principal curvatures of opposite signs and different orders of magnitude, resulting in negative Gaussian curvature. (f) Representation of a membrane tube. One principal curvature of the tube is always equal to 0, and the other is greater than zero. This results in a Gaussian curvature equal to zero. In case where protein binds on the inside of the tube, the sign of the principal curvature along the perimeter of the tube is inverted, but the sign of principal curvature of the tube remains zero, thus preserving zero Gaussian curvature. The supports in this study were defined by a periodic arrangement of convexities and concavities; they can thus best be approximated as a mixture of the shapes described in (b), (c) and (e).



**Supplementary Figure 3)**

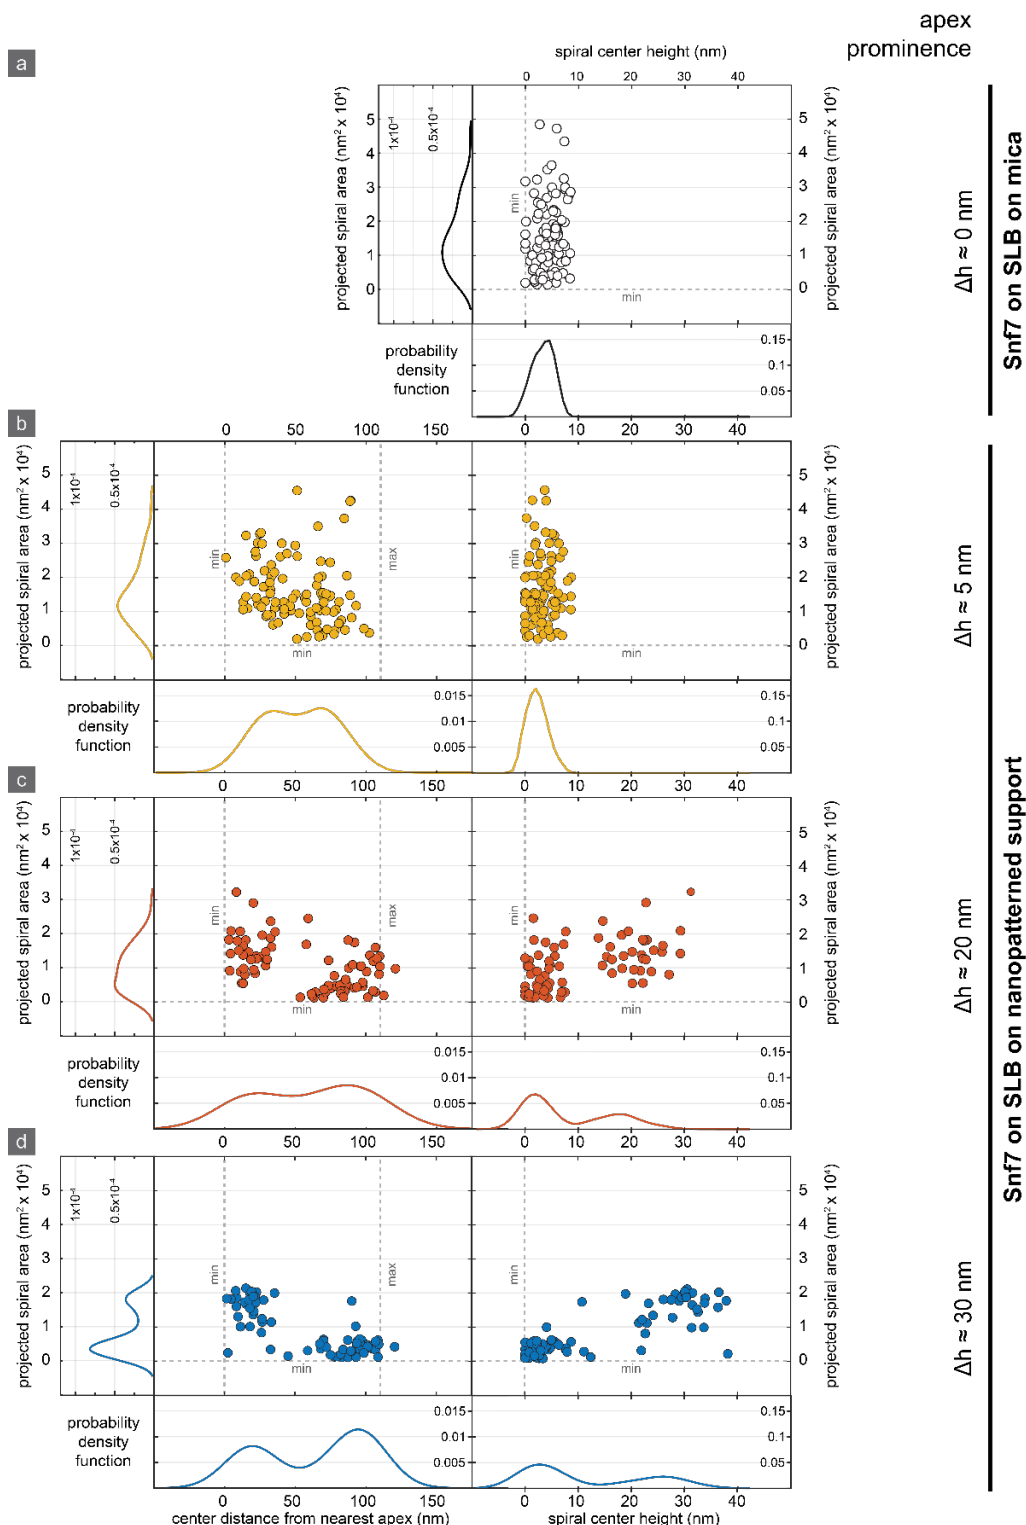

**Supplementary Figure 3: Snf7 spirals are membrane curvature sensitive (separation of plots shown in figure 3 in the main text).** (a,b,c,d) Distributions of 2D-projected Snf7 spiral areas on planar (a) and undulated supports of low ( $\Delta h \approx 5 \text{ nm}$ , b), moderate ( $\Delta h \approx 25 \text{ nm}$ , c), and prominent ( $\Delta h \approx 35 \text{ nm}$ , d) protrusions. Left: Scatter plots of Snf7 spirals, with 2D-projected area versus spiral center distance from nearest apex (b,c,d). Right: Scatter plots of Snf7 spirals, with 2D-projected area versus spiral center height (a,b,c,d). White:  $n=99$  spirals, 5 different imaging areas on planar substrate (a). Yellow:  $n=98$  spirals, 5 different imaging areas on substrate (b). Red:  $n=80$  spirals, 4 different imaging areas on substrate (c). Blue:  $n=78$  spirals, 5 different imaging areas on substrate (d). Source data are provided as a Source Data file.

**Supplementary Figure 4)**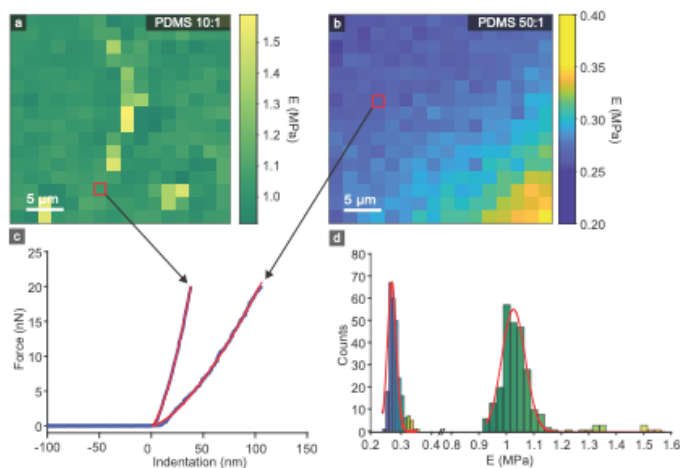

**Supplementary Figure 4: Determination of Young's modulus  $E$  of PDMS sample stages.** Force volume maps of (a) PDMS 10:1, and (b) PDMS 50:1 cured sample stages (the ratios 10:1 and 50:1 stand for the PDMS to crosslinker ratio in the mixture). (c) Representative force-distance curves with Hertz-model fits (red) for representative regions on the two substrates. (d) Distribution of Young's moduli  $E$  on the two substrates. The PDMS used in the experiments in the main text was prepared at a PDMS to crosslinker ratio of 50:1 and had an average elasticity of 270kPa. Source data are provided as a Source Data file.

**Supplementary Figure 5)**

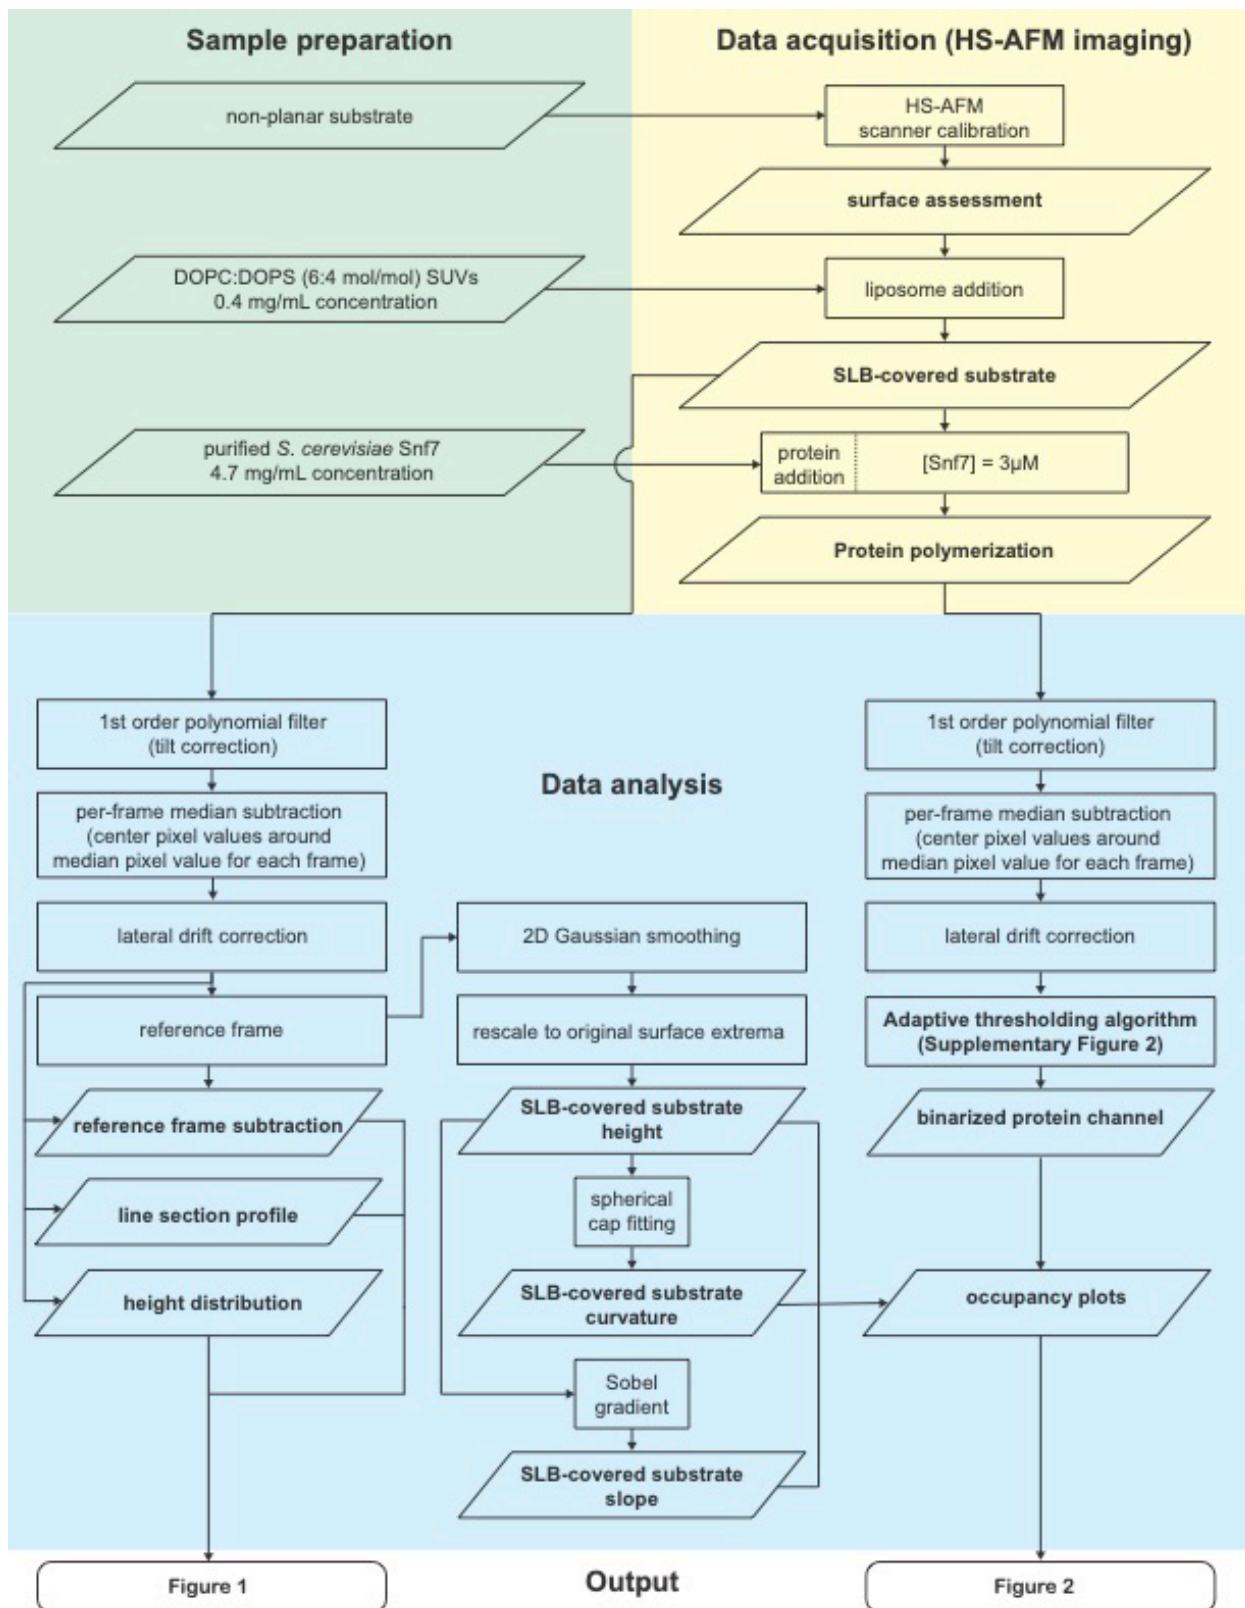

**Supplementary Figure 5: Analysis Figures 1 and 2.** Flowchart describing the individual steps in HS-AFM sample preparation (green), data acquisition (yellow), data analysis (cyan) for Figures 1 and 2.



**Supplementary Figure 6)**

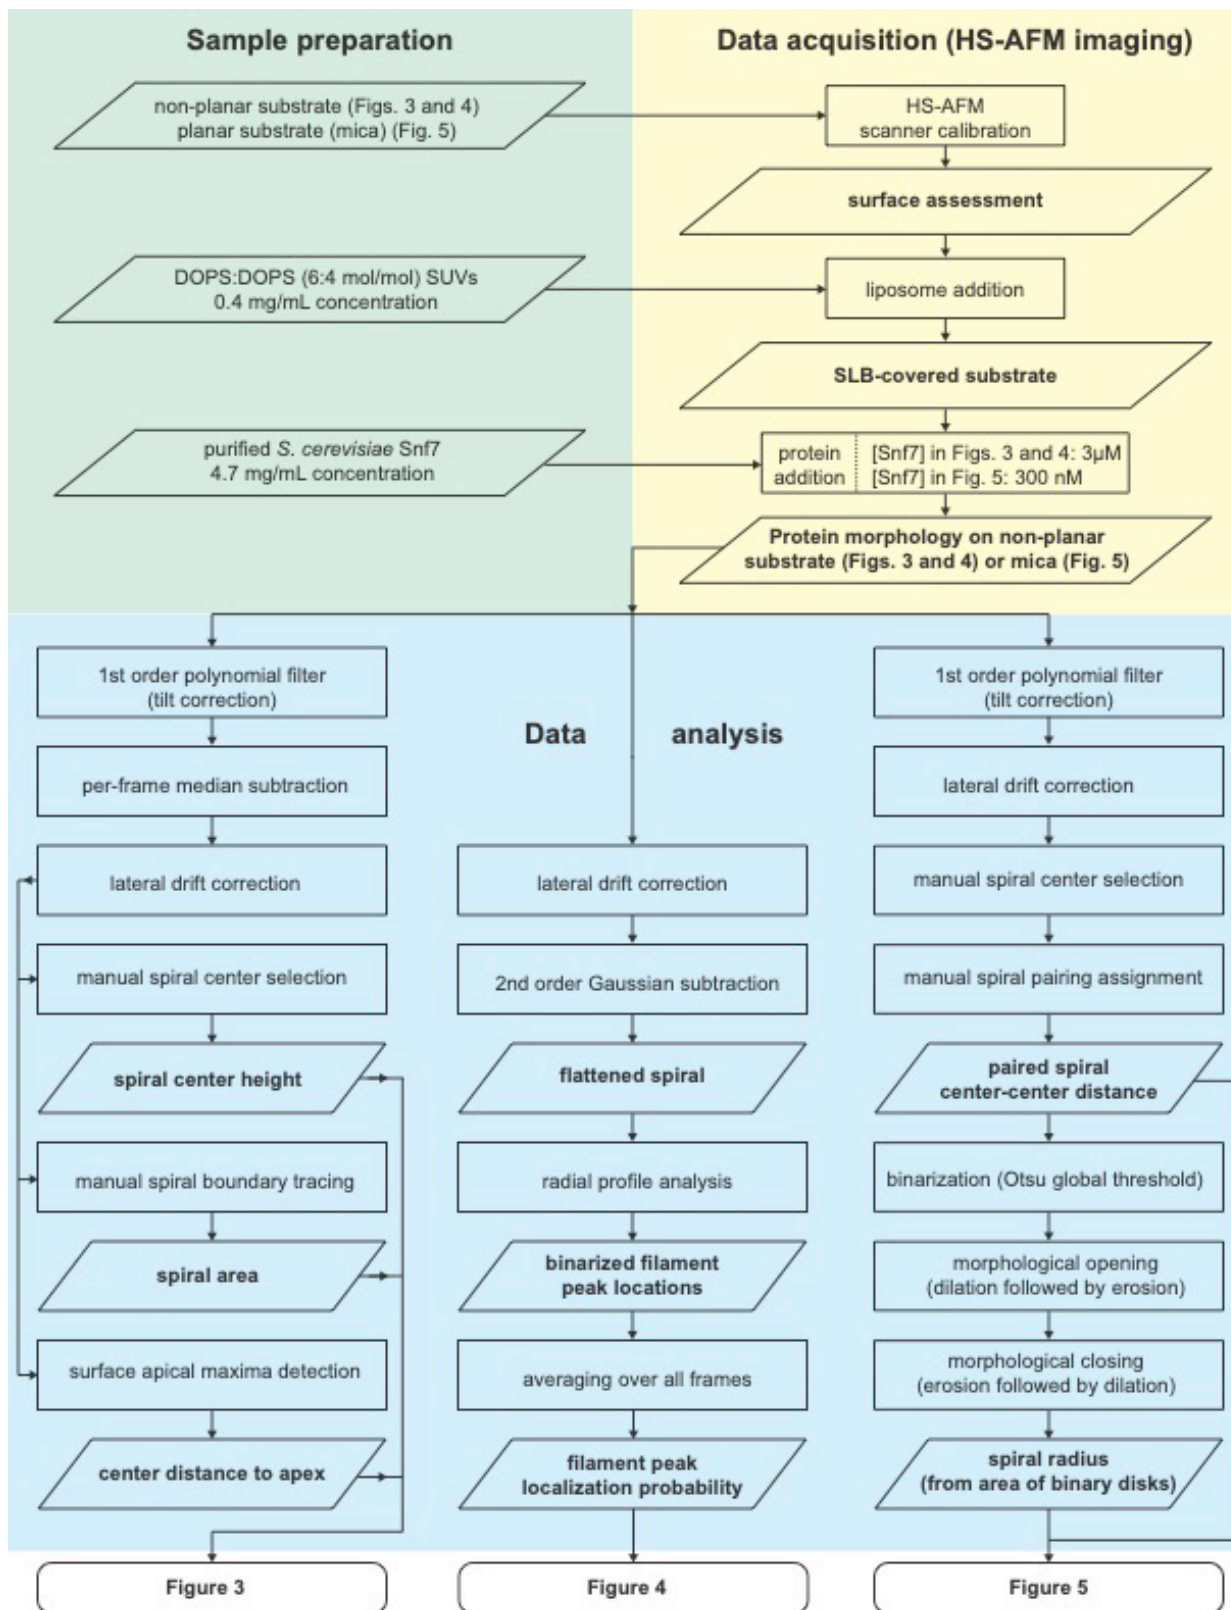

**Supplementary Figure 6: Analysis Figures 3, 4, and 5.** Flowchart describing the individual steps in HS-AFM sample preparation (green), data acquisition (yellow), data analysis (cyan) for Figures 3, 4, and 5.

**Supplementary Figure 7)**

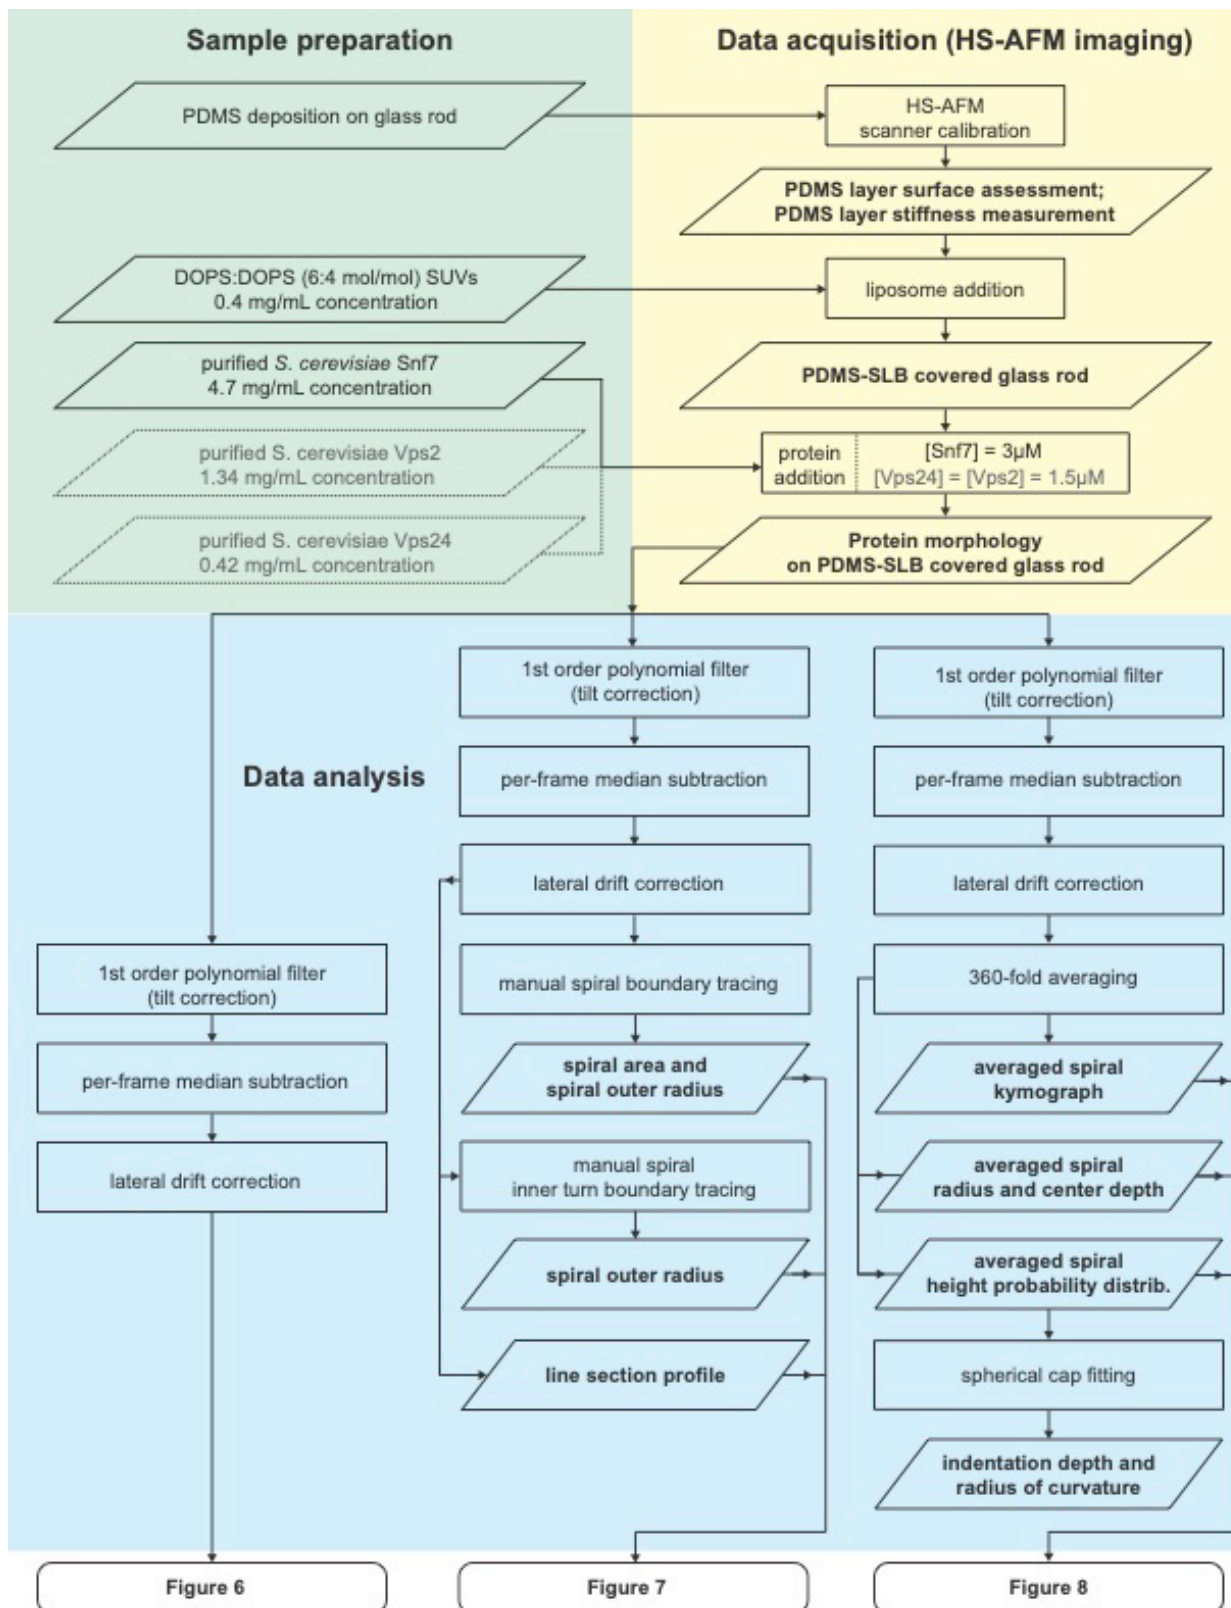

**Supplementary Figure 7: Analysis Figures 6, 7, and 8.** Flowchart describing the individual steps in HS-AFM sample preparation (green), data acquisition (yellow), data analysis (cyan) for Figures 6, 7, and 8.
